# Supplementary material
Source: publisher figshare collection journal article supplement (https://gsajournals.figshare.com/ndownloader/files/27643617)
Supplement: Supplementary file 1 [file 27643617]

## Sheet: Sheet2
Supplementary file 1. Infection types (IT) and mean of the linearized IT (LIT) scores observed on ND495 × Largo recombinant inbred lines and their parental lines tested with races TTKSK, TRTTF, and TTTTF of Puccinia graminis f. sp. tritici.
Line no.	Pedigree	TTKSK					TRTTF					TTTTF
		Rep 1_IT	Rep 1_LIT	Rep 2_IT	Rep 2_LIT	Mean of LIT	Rep 1_IT	Rep 1_LIT	Rep 2_IT	Rep 2_LIT	Mean of LIT	Rep 1_IT	Rep 1_LIT	Rep 2_IT	Rep 2_LIT	Mean of LIT
ND495	Hard red spring wheat	3+	9	3+	9	9	31+	6	1+3-	4	5	;3	3	0;13-	2	2.5
Largo	Langdon/PI 268210	2	5	2	5	5	;2-	1	;12-	1	1	22-	5	22-	5	5
PI268210	Aegilops tauschii	2-	4	2-	4	4	2-	4	2-	4	4	2-	4	2-;	3	3.5
Langdon	Durum wheat	2+	6	22+	5	5.5	;1	1	0;1	1	1	2-	4	2-	4	4
NL001	ND495/Largo	22+	5	22+	5	5	;2-	1	0;	0	0.5	;2-	1	;2-	1	1
NL002	ND495/Largo	2	5	2	5	5	2-	4	2	5	4.5			2	5
NL003	ND495/Largo	2	5	2	5	5	;2-	1	2-;	3	2	2	5	2	5	5
NL004	ND495/Largo	32+ / 3+		32+ / 3+			2	5	2	5	5	3+	9	3+	9	9
NL005	ND495/Largo	3+	9	3+	9	9	2	5	22+	5	5	2 / 3+		2 / 2+3 / 3+
NL006	ND495/Largo	2	5	2	5	5	2	5	2	5	5	2	5	2	5	5
NL007	ND495/Largo	2	5	22+	5	5	1+2	4	1+2	4	4	22+	5	32+	7	6
NL008	ND495/Largo	22+	5	22+	5	5	22+	5	2+	6	5.5	2	5	2	5	5
NL009	ND495/Largo	2+3-	6	22+	5	5.5	2	5	22+	5	5	2	5	2	5	5
NL010	ND495/Largo	32+	7	32+	7	7	2-	4	2	5	4.5	2	5	2	5	5
NL011	ND495/Largo	32+	7	2+3-	6	6.5	;11+	1	0;1	1	1	2+13;	7	;12	2	4.5
NL013	ND495/Largo	22+	5	22+	5	5	;2-	1	;1+	1	1	22+	5	22+	5	5
NL014	ND495/Largo	32+	7	3	8	7.5	2	5	2	5	5	2+3-	6	2+3	7	6.5
NL015	ND495/Largo	2+	6	2+3	7	6.5	2	5	12	3	4	22+	5	2+	5	5
NL016	ND495/Largo	3+	9	3+	9	9	33+	8	3+	9	8.5	3+	9	3+	8	8.5
NL017	ND495/Largo	3+	9	33+	8	8.5	32+	7	33+	8	7.5	23-	6	22-	5	5.5
NL018	ND495/Largo	3+	9	3+	9	9	32+	7	33+	8	7.5	2 / 3+		23 / 3+
NL019	ND495/Largo	32+	7	32+	7	7	0;1	1	0;1	1	1	2	5	2+	5	5
NL020	ND495/Largo	3+	9	3+	9	9	;2-	1	;1+	1	1	3 / 3+	9	33+	8	8.5
NL021	ND495/Largo	3+	9	3+	9	9	33+	8	3+	9	8.5	3+	9	3+	9	9
NL022	ND495/Largo	2	5	2	5	5	2	5	11+	2	3.5	3+	9	3+	9	9
NL023	ND495/Largo	2	5	2	5	5	;1	1	0;	0	0.5	;12-	1	0;1	1	1
NL024	ND495/Largo	22+	5	22+	5	5	2	5	22+	5	5	2	5	2	5	5
NL025	ND495/Largo	2-	4	2	5	4.5	2	5	12	3	4	2;	5	22-	4	4.5
NL026	ND495/Largo	2+	6	32+	7	6.5	1	2	1;	1	1.5	22+	5	2+	6	5.5
NL027	ND495/Largo	2+	6	22+	5	5.5	2	5	2	5	5	22+	5	22+	5	5
NL028	ND495/Largo	22+	5	22+	5	5	2	5	1+	3	4	3+	9	3+	9	9
NL029	ND495/Largo	22+	5	22+	5	5	1+2	4	11+	2	3	1+2+	4	22+	5	4.5
NL030	ND495/Largo	3+	9	3+	9	9	3+	9	3+	9	9	22+3	6	22+	5	5.5
NL031	ND495/Largo	32+	7	32+	7	7	2	5	12	3	4	2-	4	2-	4	4
NL032	ND495/Largo	22+	5	2	5	5	2-	4	22-	5	4.5	2	5	2	5	5
NL033	ND495/Largo	2+3	7	32+	7	7	1;	1	;1	1	1	122+	3	11+2	3	3
NL034	ND495/Largo	2	5	2	5	5	2+	6	22+	5	5.5	3+	9	3+	9	9
NL035	ND495/Largo	2	5	2	5	5	2+	6	2+3	7	6.5	2 / 2+3 / 3+		33+	8
NL036	ND495/Largo	3	8	2+3	7	7.5	;1	1	0;1	1	1	2	5	22-	5	5
NL037	ND495/Largo	33+	8	32+	7	7.5	22+	5	1+2	4	4.5	2	5	2	5	5
NL038	ND495/Largo	2+3	7	2+	6	6.5	2-	4	;1	1	2.5	2-	4	2-	4	4
NL040	ND495/Largo	3+	9	3+	9	9	2	5	1+2	4	4.5	2 / 2+	6	22+	5	5.5
NL041	ND495/Largo	2	5	2	5	5	2	5	2	5	5	2	5	2	5	5
NL042	ND495/Largo	3+	9	3+	9	9	2	5	2+	6	5.5	2	5	2	5	5
NL043	ND495/Largo	2	5	2	5	5	1;	1	;1	1	1	2-;	3	22-	5	4
NL044	ND495/Largo	2	5	22+	5	5	11+	2	;1	1	1.5	2-	4	12-	3	3.5
NL045	ND495/Largo	3+	9	3+	9	9	12	3	13-	4	3.5	3+	9	3+	9	9
NL046	ND495/Largo	2	5	2	5	5	2-	4	2	5	4.5	2	5	2	5	5
NL047	ND495/Largo	32+	8	22+	5	6.5	2	5	2	5	5	22+	5	22+	5	5
NL048	ND495/Largo	2+3	7	22+	5	6	2	5	22-	5	5	2-	4	2-	4	4
NL049	ND495/Largo	22+	5	22+	5	5	;1	1	1;	1	1	22+	5	2	5	5
NL050	ND495/Largo	2+	6	22+	5	5.5	0;1	1	;1	1	1	22+	5	22+	5	5
NL051	ND495/Largo	22+	5	22+	5	5	;1	1	0;	0	0.5	2-;	3	12-	3	3
NL052	ND495/Largo	2	5	2	5	5	0;1	1	0;1	1	1	;12-	1	12-	3	2
NL053	ND495/Largo	2	5	2	5	5	0;1	1	;1	1	1	2-	4	2-	4	4
NL055	ND495/Largo	3+	9	3+	9	9	2	5	22+	5	5	3+	9	3+	9	9
NL056	ND495/Largo	33+	8	33+	8	8	2-	4	1+	3	3.5	33+	9	33+	8	8.5
NL057	ND495/Largo	2	5	2	5	5	2	5	22-	5	5	2-	4
NL058	ND495/Largo	3+	9	3+	9	9	2	5	1+3-	4	4.5	2	5	22-	5	5
NL059	ND495/Largo	2	5	2	5	5	2-	4	2-	4	4	2	5	2	5	5
NL060	ND495/Largo	32+	7	22+	5	6	2	5	2-	4	4.5	2- / 22+	5	22+	5	5
NL061	ND495/Largo	22+	5	2	5	5	2-	4	2	5	4.5	3	8	33+	8	8
NL062	ND495/Largo	3+	9	3+	9	9	2	5	2+	6	5.5	3+	9	3+	9	9
NL063	ND495/Largo	22+	5	22+	5	5	22+	5	22+	5	5	2-	4	2	5	4.5
NL064	ND495/Largo	3+	9	3+	9	9	3+	9	3+	9	9	3+	9
NL065	ND495/Largo	22+	5	2	5	5	2-	4	1;	1	2.5	2	5	2	5	5
NL066	ND495/Largo	2	5	2	5	5	;2-	1	;1	1	1	12-	3	1+2-	3	3
NL067	ND495/Largo	3+	9	33+	8	8.5	33+	8	33+	8	8	22-	5	22-	5	5
NL068	ND495/Largo	33+	8	3+	9	8.5	22+	5	22+	5	5	3+	9	3+	9	9
NL069	ND495/Largo	22+	5	2	5	5	22+	5	22+	5	5	3+	9	3+	9	9
NL070	ND495/Largo	3+	9	3+	9	9	32+	7	2+3	7	7	2	5	2+2	6	5.5
NL071	ND495/Largo	3+	9	3+	9	9	3+	9	33+	8	8.5	3+	9	3+	9	9
NL072	ND495/Largo	3+	9	3+	9	9	33+	8	3+ / 2			3+	9	3+	9	9
NL073	ND495/Largo	2	5	2	5	5	2-	4	22-	5	4.5	2	5	2	5	5
NL074	ND495/Largo	22+	5	32+	7	6	33-	8	2+3-	6	7	22-	5	22+	5	5
NL075	ND495/Largo	32+	7	33+	8	7.5	2	5	22+	5	5	2	5	2	5	5
NL076	ND495/Largo	33+	8	3+	9	8.5	3+	9	32+	7	8	3+	9	3+	9	9
NL077	ND495/Largo	22+	5	2+3-	6	5.5	1+2	4	2+	6	5	3+	9	33+	8	8.5
NL078	ND495/Largo	3+	9	3+	9	9	3+	9	3+	9	9	2	5	2	5	5
NL080	ND495/Largo	3+	9	3+	9	9	12	3	11+	2	2.5	2-	4	22+	5	4.5
NL081	ND495/Largo	2	5	22+	5	5	;2-	1	;1	1	1	2	5	2	5	5
NL082	ND495/Largo	3+	9	3+	9	9	22+	5	22+	5	5	3+	9	3+	9	9
NL083	ND495/Largo	32+	7	33+	8	7.5	2	5	2	5	5	2	5
NL084	ND495/Largo	2+	6	2+3-	6	6	2+	6	2+	6	6	2	5	2	5	5
NL085	ND495/Largo	2	5	22+	5	5	;1	0	;	0	0	2-	4	2-	4	4
NL086	ND495/Largo	22-	5	2	5	5	;2-	1	2-	4	2.5	2-	4	22-	5	4.5
NL087	ND495/Largo	2	5	2	5	5	;12-	1	;1	1	1	22-	5	2	5	5
NL088	ND495/Largo	22+	5	22+	5	5	12	3	2	5	4	2	5	2	5	5
NL089	ND495/Largo	2	5	2	5	5	0;	0	;	0	0	22+	5	2	5	5
NL090	ND495/Largo	22+	5	32+	7	6	2	5	2	5	5	2	5	2	5	5
NL091	ND495/Largo	22+	5	2+3-	6	5.5	2-	4	22+	5	4.5	2	5	2+	6	5.5
NL092	ND495/Largo	33+	8	3+	9	8.5	3+	9	3+	9	9	3+	9	3+	9	9
NL093	ND495/Largo	2+3-	6	32+	7	6.5	22-	5	1;	1	3	3+	9	3+	9	9
NL094	ND495/Largo	2+	6	33+	8	7	;2-	1	;1	1	1	12-	3	2-	4	3.5
NL095	ND495/Largo	2	5	2	5	5	2-	4	12-	3	3.5	2 / 22+	5	2	5	5
NL096	ND495/Largo	2+3-	6	33+	8	7	2	5	2--	3	4	2	5	2	5	5
NL097	ND495/Largo	2	5	2	5	5	;2-	1	;1	1	1	22-	5	2-	4	4.5
NL098	ND495/Largo	3+	9	33+	8	8.5	22-	5	1;	1	3	2	5	2	5	5
NL099	ND495/Largo	3+	9	3+	9	9	33+	8	33+	8	8	2	5	22+	5	5
NL100	ND495/Largo	3+	9	3+	9	9	2	5	22+	5	5	22+	5	2	5	5
NL101	ND495/Largo	32+	7	2+3	7	7	2	5	22+	5	5	2+3- / 2	6	22+	5	5.5
NL102	ND495/Largo	2	5	2	5	5	2-	4	12	3	3.5	22+	5	22+	5	5
NL103	ND495/Largo	2	5	2	5	5	2-	4	2-	4	4	2	5	2	5	5
NL104	ND495/Largo	3+	9	3+	9	9	2-	4	;11+	1	2.5	3+	9	33+	8	8.5
NL105	ND495/Largo	32+	7	32+	7	7	2	5	12	3	4	2-	4	22-	5	4.5
NL106	ND495/Largo	2	5	2	5	5	;2-	1	2-	4	2.5	2	5	2	5	5
NL107	ND495/Largo	2+	6	2+3	7	6.5	2-	4	2	5	4.5	2	5	2	5	5
NL108	ND495/Largo	3+	9	3+	9	9	33+	8	33+	8	8	2	5	2	5	5
NL109	ND495/Largo	22+	5	22+	5	5	;2-	1	;1	1	1	2-	4	2-	4	4
NL110	ND495/Largo	2+	6	2+3	7	6.5	;12-	1	;1	1	1	2	5	22-	5	5
NL111	ND495/Largo	2+	6	2+	6	6	2	5	2	5	5	2	5	2	5	5
NL112	ND495/Largo	33+	8	3+	9	8.5	11+	2	;13-	2	2	2-;	4	2-	4	4
NL113	ND495/Largo	22+	5	2+	6	5.5	2	5	22+	5	5	22+	5	22+	5	5
NL114	ND495/Largo	3+	9	3+	9	9	2+3-	6	2+3	7	6.5	;1	1	0;1	1	1
NL115	ND495/Largo	2	5	2	5	5	2	5	22+	5	5	3	8	33+	8	8
NL116	ND495/Largo	2+3	7	32+	7	7	;2-	1	;1	1	1	0;	0	0;1	1	0.5
NL117	ND495/Largo	2	5	2	5	5	2-	4	2	5	4.5	0;1	1	0;1	1	1
NL118	ND495/Largo	2+	6	22+	5	5.5	22+	5	22+	5	5	2-;	3	2-;	3	3
NL119	ND495/Largo	32+	7	33+	8	7.5	2-	4	2	5	4.5	2	5	2	5	5
NL120	ND495/Largo	2	5	2	5	5	2-	4	2	5	4.5	2	5	2+	6	5.5
NL121	ND495/Largo	2+3-	6	2+	6	6	22-	5	2-	4	4.5	2-	4	2-	4	4
NL122	ND495/Largo	3+	9	3+	9	9	1+	3	1;	1	2	0;	0	0;	0	0
NL123	ND495/Largo	2	5	2	5	5	2-	4	;1	1	2.5	2-	4	22-	5	4.5
NL124	ND495/Largo	22+	5	2	5	5	22+	5	12-	3	4	0;	0
NL125	ND495/Largo	22+	5	2	5	5	1+2	4	11+	2	3	2	5	2	5	5
NL126	ND495/Largo	32+	7	33+	8	7.5	;2	2	1;	1	1.5	3	8	3	8	8
NL127	ND495/Largo	3+	9	3+	9	9	22+	5	2+3	7	6	;12-	1	;2-	1	1
NL128	ND495/Largo	2+3	7	2+3	7	7	;2-	1	;1-	0	0.5	0;	0	0;	0	0
NL129	ND495/Largo	33+	8	3+	9	8.5	22+	5	12-	3	4	22-	5
NL130	ND495/Largo	32+	7	22+	5	6	2	5	2-	4	4.5	;12-	1	;2-	1	1
NL132	ND495/Largo	2	5	2	5	5	2-	4	2	5	4.5	;12-	1	;12-	1	1
NL133	ND495/Largo	2	5	2	5	5	2-	4	2	5	4.5	0;	0	0;	0	0
NL134	ND495/Largo	32+	7	2+	6	6.5	0;1	1	0;	0	0.5	;1	1	;2-	1	1
NL135	ND495/Largo	22+	5	22+	5	5	22+	5	22+	5	5	;2-	1	;2-	1	1
NL136	ND495/Largo	22+	5	2+	6	5.5	0;2-	1	0;1	1	1	2-	4	2-	4	4
NL137	ND495/Largo	3+	9	3+	9	9	2-	4	;11+	1	2.5	22-	5	2	5	5
NL138	ND495/Largo	3+	9	33+	8	8.5	1+	3	11+	2	2.5	0;1	1	0;1	1	1
NL139	ND495/Largo	3+	9	3+	9	9	22+	5	2+3-	6	5.5	2-	4	;2-	1	2.5
NL140	ND495/Largo	2	5	2	5	5	2-	4	2	5	4.5	2-	4	2	5	4.5
NL141	ND495/Largo	22+	5	22+	5	5	;12-	1	1;	1	1	2-	4	22-	5	4.5
NL142	ND495/Largo	22+	5	22+	5	5	12	3	1;	1	2	22-	5	2	5	5
NL143	ND495/Largo	2	5	2	5	5	0;1	1	;1	1	1	0;	0	0;	0	0
NL144	ND495/Largo	2	5	2	5	5	2-	4	2-	4	4	;2-	1	0;1	1	1
NL145	ND495/Largo	2	5	22+	5	5	2-	4	2-	4	4	33+	8	33+	8	8
NL146	ND495/Largo	3+	9	3+	9	9			0;1	1		0;1	1	0;	0	0.5
NL147	ND495/Largo	22+	5	2	5	5	12-	3	;12-	1	2	2-	4	;2-	1	2.5
NL148	ND495/Largo	32+	7	32+	7	7	22+	5	2	5	5	2+	6	22+	5	5.5
NL149	ND495/Largo	2	5	2	5	5	;12-	1	12-	3	2	0;	0	0;	0	0
NL150	ND495/Largo	32+	7	2 / 3+					2	5		11+	2	1+3-	4	3
NL151	ND495/Largo	32+	7	22+	5	6	1+2	3	11+	2	2.5	22+	5	1+3	5	5
NL152	ND495/Largo	2	5	2	5	5	2	5	22+	5	5	2+3	7	32+	7	7
NL153	ND495/Largo	2	5	2	5	5	2-	4	2-	4	4	2	5	22+	5	5
NL154	ND495/Largo	22+	5	32+	7	6	22+	5	2-	4	4.5	2+	6	22+	5	5.5
NL155	ND495/Largo	32+	7	32+	7	7	0;	0	0;	0	0	0;	0	0;	0	0
NL156	ND495/Largo	2+	6	2+3	7	6.5	22-	5	;12-	1	3	0;	0	0;1	1	0.5
NL157	ND495/Largo	2	5	2	5	5	2-	4	2	5	4.5	;2-	1	0;	0	0.5
NL158	ND495/Largo	2	5	2	5	5	2	5	11+;	1	3	2+3-	7	2+	6	6.5
NL159	ND495/Largo	2	5	2	5	5	;12-	1	;1	1	1	0;	0	0;1	1	0.5
NL160	ND495/Largo	3	8	3+	9	8.5	32+	7	1+3-	4	5.5	3+	9	3+	9	9
NL161	ND495/Largo	2	5	22+	5	5	2-	4	11+	2	3	2-	4	2-	4	4
NL162	ND495/Largo	2+3-	6	2+3-	6	6	;1	1	0;1	1	1	;11+	1	11	2	1.5
NL163	ND495/Largo	22+	5	2	5	5	2-	4	22-	5	4.5	3+	9	3+	9	9
NL164	ND495/Largo	2	5	2	5	5	2-	4	2-	4	4	2	5	2	5	5
NL165	ND495/Largo	3+	9	3+	9	9	3+	9	3+	9	9	2	5	2	5	5
NL166	ND495/Largo	3+	9	33+	8	8.5	;1	1	0;	0	0.5	12-	3	2-;	3	3
NL167	ND495/Largo	2	5	2	5	5	22-	5	1+	3	4	0; / 13-		;11+	1
NL168	ND495/Largo	2+	6	22+	5	5.5	2-	4	2	5	4.5	2-	4
NL169	ND495/Largo	22+	5	22+	5	5	2	5	2	5	5	3-1+	6	1+3-	4	5
NL170	ND495/Largo	2	5	2	5	5	2-	4	22-	5	4.5	2	5	2	5	5
NL171	ND495/Largo	22+	5	2	5	5	2	5	2	5	5	0;1	1	;2-	1	1
NL172	ND495/Largo	22+	5	2	5	5	12	3	1;	1	2	3	8	3	8	8
NL173	ND495/Largo	2+	6	22+	5	5.5	2	5	2	5	5	1;	1	0;1 / 2
NL174	ND495/Largo	33+	8	3+	9	8.5	2	5	22+	5	5	;2-	1	;12-	1	1
NL175	ND495/Largo	32+	7	3	8	7.5	2	5	2	5	5	2	5	2	5	5
NL176	ND495/Largo	32+	7	32+	7	7	2-	4	12	3	3.5	0;2	2	0;1	1	1.5
NL177	ND495/Largo	32+	7	22+	5	6	;12-	1	1;	1	1	33+	8	3+	9	8.5
NL178	ND495/Largo	2+	6	2+	6	6	;2-	1	;1	0	0.5	2	5	22-	5	5
NL179	ND495/Largo	22+	5	32+	7	6	;2	2	22+	5	3.5	2	5	2	5	5
NL180	ND495/Largo	2	5	2	5	5	;2-	1	2	5	3	;12-	1	2-	4	2.5
NL181	ND495/Largo	2	5	2	5	5	0;1	1	0;	0	0.5	12-	3	12-	3	3
NL182	ND495/Largo	22+	5	2+	6	5.5	2	5	2	5	5	22-	5	22-	5	5
NL183	ND495/Largo	3+	9	33+	8	8.5	32+	7	2+3	7	7	2-;	3	;12-	1	2
NL184	ND495/Largo	3+	9	3+	9	9	2+	6	3;	5	5.5	2-	4	22-	5	4.5
NL185	ND495/Largo	3+	9	3+	9	9	2+	6	22+	5	5.5	3+	9	3+	9	9
NL186	ND495/Largo	2	5	22+	5	5	;1	1	12-	3	2	2	5
NL187	ND495/Largo	3+	9	3+	9	9	;12-	1	;1	1	1	0;	0	0;	0	0
NL188	ND495/Largo	3+	9	3+	9	9	22+	5	2+3-	6	5.5	3+	9	3+	9	9
NL189	ND495/Largo	2	5	2	5	5	;2-	1	0;	0	0.5	0;	0	0;	0	0
NL190	ND495/Largo	22+	5	32+	7	6	;1	1	;1	1	1	2	5	22-	5	5
NL191	ND495/Largo	33+	8	33+	8	8	2	5	2+	6	5.5	2+	6	2+	6	6
NL192	ND495/Largo	2	5	2	5	5	2-	4	2	5	4.5	;2-	1	;2- / 2+
NL193	ND495/Largo	2	5	2	5	5	;12-	1	1;	1	1	0;	0
NL194	ND495/Largo	3+	9	3+	9	9	22+	5	23-	6	5.5	3+	9	3+	9	9
NL195	ND495/Largo	2+	6	22+	5	5.5	2-	4	22-	5	4.5	33+	9	3+	9	9
NL196	ND495/Largo	3+	9	3+	9	9	33+	8	33-	8	8	3+	9	3+	9	9
NL197	ND495/Largo	2	5	22+	5	5	22-	5	2-	4	4.5	2	5	2	5	5
NL199	ND495/Largo	22+	5	2	5	5	2	5	22+	5	5	0;1+	1	0;1	1	1
NL200	ND495/Largo	2	5	2	5	5	2-	4	22-	5	4.5	22+	5	22+	5	5
NL201	ND495/Largo	3+	9	3+	9	9	2-	4	12-	3	3.5	;12-	1	0;2-	1	1
NL202	ND495/Largo	2+3	7	32+	7	7	2	5	11+	2	3.5	0;1	1	0;1	1	1
NL203	ND495/Largo	2+	6	2+3	7	6.5	22+	5	1+3-	4	4.5	33+	8	33+	8	8
NL204	ND495/Largo	2	5	2	5	5	;2-	1	2-	4	2.5	0;1	1	0;	0	0.5
NL205	ND495/Largo	3+	9	3+	9	9	2-	4	;11+	1	2.5	2	5	2	5	5
NL206	ND495/Largo	22+	5	2+3	7	6	22-	5	2	5	5	22+	5	2+	6	5.5
NL207	ND495/Largo	2	5	2	5	5	;12-	1	0;1	1	1	2	5	2	5	5
NL208	ND495/Largo	3+	9	3+	9	9	33+	8	3+	9	8.5	2	5	22+	5	5
NL209	ND495/Largo	2	5	22+	5	5	;12-	1	;1	1	1	33+	8	33+	8	8
NL210	ND495/Largo	2	5	2	5	5	2-	4	12-	3	3.5	22-	5	2	5	5
NL212	ND495/Largo	2	5	2	5	5	2-	4	2-	4	4	2	5	2	5	5
NL213	ND495/Largo	2	5	2	5	5	;12-	1	0;1	1	1	12-	3	;12-	1	2
NL214	ND495/Largo	2	5	2	5	5	2-	4	2-	4	4	22-	5	2	5	5
NL215	ND495/Largo	22+	5	2+	6	5.5	2-	4	;12-	1	2.5	2-	4	22-	5	4.5
NL216	ND495/Largo	2	5	2	5	5	12-	3	12-	3	3	2-;	4	22-	5	4.5
NL217	ND495/Largo	22+	5	2+3-	6	5.5	2	5	11+	2	3.5	22+	5	22+	5	5
NL218	ND495/Largo	2+	6	33+	8	7	;12-	1	;1	1	1	2	5	1+2	4	4.5
NL219	ND495/Largo	22+	5	22+	5	5	1+2	4	1+3-	4	4	2	5
NL220	ND495/Largo	32+	7	2+	6	6.5	;2-	1	1;	1	1	1+2	4	2	5	4.5
NL221	ND495/Largo	3+	9	3+	9	9	3+	9	3+	9	9	3+	9	3+	9	9
NL222	ND495/Largo	3+	9	3+	9	9	22-	5	31;	5	5	3+	9	3+	9	9
NL223	ND495/Largo	3	8	32+	7	7.5	2-	4	2	5	4.5	2	5	2	5	5
NL224	ND495/Largo	22+	5	2	5	5	;2-	1	2-	4	2.5	;12-	1	2-;	3	2
NL225	ND495/Largo	22+	5	2	5	5	2	5	;11+	1	3	22-	5	22+	5	5
NL226	ND495/Largo	3+	9	33+	8	8.5	3+	9	33+	8	8.5	22-	5	2	5	5
NL228	ND495/Largo	32+	7	2+	6	6.5	2	5	2	5	5	22+	5	22+	5	5
NL229	ND495/Largo	32+	7	22+	5	6	22-	5	2-	4	4.5	2	5	2	5	5
NL230	ND495/Largo	3	8	32+	7	7.5	;12-	1	1;	1	1	22+	5	1+2	4	4.5
NL232	ND495/Largo	22+	5	2	5	5	12-	3	12	3	3	2-;	3	2-	4	3.5
NL233	ND495/Largo	22+	5	2	5	5	;12-	1	1;	1	1	2-	4	2-	4	4
NL234	ND495/Largo	3+	9	3+	9	9	2+	6	22+	5	5.5	3+	9	3+	9	9
NL235	ND495/Largo	22+	5	2	5	5	2-	4	2	5	4.5	2+3	7	22+	5	6
Infection types (ITs) were scored based Stakman (1962) where 0, fleck (;), 1, or 2, are considered resistant, and 3 or 4 are considered susceptible. For leaves exhibiting combinations of ITs, order indicates predominant types. The symbols "-", "=", and "+" indicated small, very small, or large pustules within a class. The symbol "/" in the ITs indicated segregation of ITs among the plants. Linear…
